# Supplementary material for: Maternal Mental Health in Pregnancy and Its Impact on Children’s Cognitive Development at 18 Months, during the COVID-19 Pandemic (CONCEPTION Study)
Source: MDPI journal article supplement (doi:10.3390/jcm13041055), 2024-02-13
Supplement: s1 [file s1]

Table 1A Association between *in utero* exposure to depression, anxiety, stress, antidepressants, and Ages and stages questionnaire – third edition (ASQ-3) - cohort restricted to children aged 17 to 19 months

|                                                                                      | DS         | RLAM       | Crude OR (95%CI) | Adjusted OR*<br>(95%CI) | FRAP       | Crude OR (95%CI) | Adjusted OR*<br>(95% CI) |
|--------------------------------------------------------------------------------------|------------|------------|------------------|-------------------------|------------|------------------|--------------------------|
| <b>Communication</b>                                                                 |            |            |                  |                         |            |                  |                          |
| <b><i>In utero</i> exposure to maternal depression</b>                               |            |            |                  |                         |            |                  |                          |
| None to mild (EPDS<9)                                                                | 173 (60.5) | 33 (57.9)  | Reference        | Reference               | 3 (50.0)   | Reference        | Reference                |
| Moderate to severe (EPDS≥ 9)                                                         | 113 (39.5) | 24 (42.1)  | 1.11 (0.63;1.98) | 0.98 (0.48;2.02)        | 3 (50.0)   | 1.53 (0.30;7.72) | 1.60 (0.16;16.0)         |
| <b><i>In utero</i> exposure to maternal anxiety</b>                                  |            |            |                  |                         |            |                  |                          |
| None to mild (GAD-7 ≤ 9)                                                             | 263 (92.0) | 50 (87.7)  | Reference        | Reference               | 4.0 (66.7) | Reference        | Reference                |
| Moderate to severe (GAD-7>9)                                                         | 23 (8.0)   | 7.0 (12.3) | 1.60 (0.65;3.93) | 1.70 (0.56;5.13)        | 2 (33.3)   | 5.72 (0.99;32.9) | 7.59 (0.41;140)          |
| <b><i>In utero</i> exposure to stress related to the COVID-19 pandemic;mean (SD)</b> | 4.4 (2.1)  | 4.6 (2.0)  | 1.03 (0.90;1.18) | 1.03 (0.87;1.23)        | 4.3 (2.4)  | 0.97 (0.66;1.44) | 0.93 (0.53;1.62)         |
| <b><i>In utero</i> exposure to maternal antidepressants</b>                          |            |            |                  |                         |            |                  |                          |
| No                                                                                   | 229 (80.1) | 41 (71.9)  |                  |                         | 4 (66.7)   |                  |                          |
| Yes                                                                                  | 57 (19.9)  | 16 (28.1)  | 1.57 (0.82;2.99) | 2.05 (0.66;6.32)        | 2 (33.3)   | 2.01 (0.36;11.2) | 0.45 (0.01;20.6)         |
| <b>Gross motor</b>                                                                   |            |            |                  |                         |            |                  |                          |
| <b><i>In utero</i> exposure to maternal depression</b>                               |            |            |                  |                         |            |                  |                          |
| None to mild (EPDS<9)                                                                | 175 (59.7) | 20 (60.6)  | Reference        | Reference               | 12 (54.5)  | Reference        | Reference                |
| Moderate to severe (EPDS≥ 9)                                                         | 118 (40.3) | 13 (39.4)  | 0.96 (0.46;2.01) | 0.82 (0.29;2.29)        | 10 (45.5)  | 1.24 (0.52;2.95) | 0.78 (0.26;2.34)         |
| <b><i>In utero</i> exposure to maternal anxiety</b>                                  |            |            |                  |                         |            |                  |                          |
| None to mild (GAD-7 ≤ 9)                                                             | 269 (91.8) | 26 (78.8)  | Reference        | Reference               | 20 (90.9)  | Reference        | Reference                |
| Moderate to severe (GAD-7>9)                                                         | 24 (8.2)   | 7 (21.2)   | 3.02 (1.19;7.67) | <b>5.53 (1.52;20.1)</b> | 2 (9.1)    | 1.12 (0.25;5.09) | 1.00 (0.15;6.62)         |
| <b><i>In utero</i> exposure to stress related to the COVID-19 pandemic;mean (SD)</b> | 4.5 (2.1)  | 4.1 (1.7)  | 0.91 (0.76;1.08) | 0.84 (0.66;1.06)        | 5.2 (1.7)  | 1.18 (0.96;1.47) | 1.31 (0.99;1.73)         |
| <b><i>In utero</i> exposure to maternal antidepressants</b>                          |            |            |                  |                         |            |                  |                          |
| No                                                                                   | 232 (79.2) | 23 (69.7)  | Reference        | Reference               | 19 (86.4)  | Reference        | Reference                |
| Yes                                                                                  | 61 (20.8)  | 10 (30.3)  | 1.65 (0.75;3.66) | 3.09 (0.67;14.2)        | 3 (13.6)   | 0.60 (0.17;2.10) | 0.79 (0.10;6.30)         |

Table 1A (Continued)

|                                                                                      | DS         | RLAM      | Crude OR (95%CI) | Adjusted OR* (95%CI)    | FRAP      | Crude OR (95%CI) | Adjusted OR* (95% CI) |
|--------------------------------------------------------------------------------------|------------|-----------|------------------|-------------------------|-----------|------------------|-----------------------|
| <b>Fine motor</b>                                                                    |            |           |                  |                         |           |                  |                       |
| <b><i>In utero exposure to maternal depression</i></b>                               |            |           |                  |                         |           |                  |                       |
| None to mild (EPDS<9)                                                                | 189 (59.2) | 12 (54.5) | Reference        | Reference               | 6 (85.7)  | Reference        | Reference             |
| Moderate to severe (EPDS≥ 9)                                                         | 130 (40.8) | 10 (45.5) | 1.21 (0.51;2.89) | 2.21 (0.70;6.97)        | 1 (14.3)  | 0.24 (0.03;2.04) | 0.10 (0.00;2.56)      |
| <b><i>In utero exposure to maternal anxiety</i></b>                                  |            |           |                  |                         |           |                  |                       |
| None to mild (GAD-7 ≤ 9)                                                             | 289 (90.6) | 20 (90.9) | Reference        | Reference               | 6 (85.7)  | Reference        | Reference             |
| Moderate to severe (GAD-7>9)                                                         | 30 (9.4)   | 2 (9.1)   | 0.96 (0.21;4.32) | 0.88 (0.15;5.19)        | 1 (14.3)  | 1.61 (0.19;13.8) | 8.52 (0.30;243)       |
| <b><i>In utero exposure to stress related to the COVID-19 pandemic;mean (SD)</i></b> | 4.5 (2.1)  | 4 (1.6)   | 0.85 (0.69;1.06) | 0.78 (0.58;1.05)        | 3.9 (2.0) | 0.88 (0.61;1.28) | 0.94 (0.59;1.50)      |
| <b><i>In utero exposure to maternal antidepressants</i></b>                          |            |           |                  |                         |           |                  |                       |
| No                                                                                   | 253 (79.3) | 15 (68.2) | Reference        | Reference               | 6 (85.7)  | Reference        | Reference             |
| Yes                                                                                  | 66 (20.7)  | 7 (31.8)  | 1.79 (0.70;4.57) | <b>4.70 (1.15;19.1)</b> | 1 (14.3)  | 0.64 (0.08;5.40) | 0.39 (0.01;11.8)      |
| <b>Problem solving</b>                                                               |            |           |                  |                         |           |                  |                       |
| <b><i>In utero exposure to maternal depression</i></b>                               |            |           |                  |                         |           |                  |                       |
| None to mild (EPDS<9)                                                                | 160 (57.3) | 28 (71.8) | Reference        | Reference               | 16 (72.7) | Reference        | Reference             |
| Moderate to severe (EPDS≥ 9)                                                         | 119 (42.7) | 11 (28.2) | 0.53 (0.25;1.10) | 0.45 (0.18;1.12)        | 6 (27.3)  | 0.50 (0.19;1.33) | 0.44 (0.13;1.50)      |
| <b><i>In utero exposure to maternal anxiety</i></b>                                  |            |           |                  |                         |           |                  |                       |
| None to mild (GAD-7 ≤ 9)                                                             | 251 (90.0) | 36 (92.3) | Reference        | Reference               | 21 (95.5) | Reference        | Reference             |
| Moderate to severe (GAD-7>9)                                                         | 28 (10.0)  | 3 (7.7)   | 0.75 (0.22;2.58) | 1.01 (0.23;4.51)        | 1 (4.5)   | 0.43 (0.06;3.30) | 0.26 (0.02;3.31)      |
| <b><i>In utero exposure to stress related to the COVID-19 pandemic;mean (SD)</i></b> | 4.5 (2.1)  | 4.4 (1.9) | 0.98 (0.84;1.16) | 1.12 (0.91;1.38)        | 4.1 (1.8) | 0.92 (0.74;1.13) | 0.95 (0.73;1.25)      |
| <b><i>In utero exposure to maternal antidepressants</i></b>                          |            |           |                  |                         |           |                  |                       |
| No                                                                                   | 216 (77.4) | 34 (87.2) | Reference        | Reference               | 18 (81.8) | Reference        | Reference             |
| Yes                                                                                  | 63 (22.6)  | 5 (12.8)  | 0.50 (0.19;1.34) | 0.65 (0.12;3.40)        | 4 (18.2)  | 0.76 (0.25;2.33) | 1.04 (0.13;7.98)      |

Table 1A (Continued)

|                                                                                      | DS         | RLAM      | Crude OR<br>(95%CI) | Adjusted OR*<br>(95%CI) | FRAP      | Crude OR<br>(95%CI) | Adjusted OR*<br>(95% CI) |
|--------------------------------------------------------------------------------------|------------|-----------|---------------------|-------------------------|-----------|---------------------|--------------------------|
| <b>Personal and social</b>                                                           |            |           |                     |                         |           |                     |                          |
| <b><i>In utero exposure to maternal depression</i></b>                               |            |           |                     |                         |           |                     |                          |
| None to mild (EPDS<9)                                                                | 181 (59.5) | 17 (56.7) | Reference           | Reference               | 7 (77.8)  | Reference           | Reference                |
| Moderate to severe (EPDS≥ 9)                                                         | 123 (40.5) | 13 (43.3) | 0.42 (0.09;2.06)    | 0.34 (0.05;2.26)        | 2 (22.2)  | 1.13 (0.53;2.40)    | 1.29 (0.51;3.24)         |
| <b><i>In utero exposure to maternal anxiety</i></b>                                  |            |           |                     |                         |           |                     |                          |
| None to mild (GAD-7 ≤ 9)                                                             | 276 (90.8) | 26 (86.7) | Reference           | Reference               | 8 (88.9)  | Reference           | Reference                |
| Moderate to severe (GAD-7>9)                                                         | 28 (9.2)   | 4 (13.3)  | 1.23 (0.15;10.2)    | 1.44 (0.11;18.8)        | 1 (11.1)  | 1.52 (0.49;4.66)    | 1.95 (0.53;7.10)         |
| <b><i>In utero exposure to stress related to the COVID-19 pandemic;mean (SD)</i></b> | 4.5 (2.1)  | 4.1 (1.7) | 1.01 (0.73;1.39)    | 1.12 (0.73;1.72)        | 4.6 (1.8) | 0.91 (0.76;1.10)    | 0.87 (0.69;1.09)         |

SD;standard deviation; DS;Development on schedule; RLAM;Required learning activities and monitoring; FAR;further assessment required by professional

Communication scores categorized: DS above the cut-off;the child appears to be on schedule (30-60); RLAM close to the cut-off;the child needs to be provided with learning activities (15-29); FARP below the cut-off;the child may be needs further assessment by a professional (0 – 14)

Gross motor scores categorized: DS above the cut-off;the child appears to be on schedule (46-60); RLAM close to the cut-off;the child needs to be provided with learning activities (36-45); FARP below the cut-off;the child may be needs further assessment by a professional (0-35)

Fine motor scores categorized: DS above the cut-off;the child appears to be on schedule (45-60); RLAM close to the cut-off;the child needs to be provided with learning activities (35-44); FARP below the cut-off;the child may be needs further assessment by a professional (0-34)

Problem solving scores categorized: DS above the cut-off;the child appears to be on schedule (36-60); RLAM close to the cut-off;the child needs to be provided with learning activities (26-35); FARP below the cut-off;the child may be needs further assessment by a professional (0-25)

Personal and social scores categorized: DS above the cut-off;the child appears to be on schedule (38-60); RLAM close to the cut-off;the child needs to be provided with learning activities (27-37); FARP below the cut-off;the child may be needs further assessment by a professional (0-26)

Using the Edinburgh postnatal depression scale cut-off as follows: scale 0 to 8 means no in utero exposure to maternal depression;scale 9 and more means in utero exposure to moderate to severe maternal depression

Using the generalized anxiety disorder 7-items scale cut-off as follows: scale 0 to 9 means no maternal anxiety;scale 10 and more means in utero exposure to moderate to severe maternal anxiety

Using the overall maternal stress related to COVID-19 measured on a scale from 0 (no stress) to 10 (extreme stress)

Antidepressants use defined by diagnosis of depression or anxiety combined to the use of antidepressants before delivery

\*Adjusted models for potential confounders

Communication : maternal depression;maternal age at recruitment;pre-pregnancy body mass index;diabetes (including gestational diabetes);education years;maternal anxiety;maternal stress related to COVID-19 pandemic;period of recruitment;gestational age at delivery;CASC-150 score

Gross motor : maternal depression;maternal age at recruitment;annual household income;pre-pregnancy body mass index;diabetes (including gestational diabetes);hypertension (including preeclampsia);education years;maternal anxiety;maternal stress related to COVID-19 pandemic;period of recruitment;gestational age at delivery;CASC-150 score;medication use;area of residence;maternal asthma;historic of depression;ethnicity;historic of anxiety

Fine motor : maternal depression;maternal age at recruitment;annual household income;pre-pregnancy body mass index;diabetes (including gestational diabetes);education years;maternal anxiety;maternal stress related to COVID-19 pandemic;period of recruitment;gestational age at delivery;CASC-150 score;medication use;area of residence;marital status;historic of anxiety;ethnicity

Problem solving : maternal depression;maternal age at recruitment;annual household income;pre-pregnancy body mass index;diabetes (including gestational diabetes);hypertension (including preeclampsia);education years;maternal anxiety;maternal stress related to COVID-19 pandemic;period of recruitment;gestational age at delivery;CASC-150 score;medication use;maternal asthma;historic of depression;historic of anxiety;ethnicity

Personal and social : maternal depression;maternal age at recruitment;annual household income;pre-pregnancy body mass index;diabetes (including gestational diabetes);hypertension (including preeclampsia);education years;maternal anxiety;maternal stress related to COVID-19 pandemic;period of recruitment;gestational age at delivery;CASC-150 score;medication use;area of residence;marital status;maternal asthma;ethnicity;historic of depression;historic of anxiety

Bold numbers indicate significant association ( $p < 0.05$ )

Table 2A Association between in utero exposure to depression, anxiety, stress, antidepressants, and Ages and stages questionnaire – third edition (ASQ-3) – stratified on child sex

|                                                                               | Boys         |           |                         |                        | Girls        |            |                     |                         |
|-------------------------------------------------------------------------------|--------------|-----------|-------------------------|------------------------|--------------|------------|---------------------|-------------------------|
|                                                                               | DS /<br>RLAM | FRAP      | Crude OR<br>(95%CI)     | Adjusted OR<br>(95%CI) | DS /<br>RLAM | FRAP       | Crude OR<br>(95%CI) | Adjusted OR<br>(95%CI)  |
| <b>Communication<sup>a</sup></b>                                              |              |           |                         |                        |              |            |                     |                         |
| <i>In utero exposure to maternal depression</i>                               |              |           |                         |                        |              |            |                     |                         |
| None to mild (EPDS<9)                                                         | 131 (63.0)   | 4 (50.0)  | Reference               | Reference              | 106 (53.3)   | 1 (50.0)   | Reference           | Reference               |
| Moderate to severe (EPDS≥ 9)                                                  | 77 (37.0)    | 4 (50.0)  | 1.70 (0.39;7.38)        | 1.63 (0.19;14.1)       | 93 (46.7)    | 1 (50.0)   | 1.14 (0.04;29.1)    | 0.01 (0.00;4.08)        |
| <i>In utero exposure to maternal anxiety</i>                                  |              |           |                         |                        |              |            |                     |                         |
| None to mild (GAD-7 ≤ 9)                                                      | 188 (90.4)   | 6 (75.0)  | Reference               | Reference              | 182 (91.5%)  | 1 (50.0%)  | Reference           | Reference               |
| Moderate to severe (GAD-7>9)                                                  | 20 (9.6)     | 2 (25.0)  | 3.13 (0.44;14.7)        | 4.71 (0.20;121)        | 17 (8.5%)    | 1 (50.0%)  | 10.7 (0.41;279)     | NA                      |
| <i>In utero exposure to stress related to the COVID-19 pandemic;mean (SD)</i> | 4.3 (2.2)    | 4.9 (2.4) | 1.12 (0.81;1.57)        | 1.23 (0.72;2.15)       | 4.7 (2.0)    | 7 (2.8)    | 2.31 (0.95;8.53)    | 2.51 (0.64;31.7)        |
| <i>In utero exposure to maternal antidepressants</i>                          |              |           |                         |                        |              |            |                     |                         |
| No                                                                            | 173 (83.2)   | 6 (75.0)  | Reference               | Reference              | 151 (75.9%)  | 2 (100.0%) | NA                  | NA                      |
| Yes                                                                           | 35 (16.8)    | 2 (25.0)  | 1.65 (0.23;7.50)        | 0.31 (0.01;5.67)       | 48 (24.1%)   | 0 (0.0%)   | NA                  | NA                      |
| <b>Gross motor<sup>b</sup></b>                                                |              |           |                         |                        |              |            |                     |                         |
| <i>In utero exposure to maternal depression</i>                               |              |           |                         |                        |              |            |                     |                         |
| None to mild (EPDS<9)                                                         | 128 (64.7)   | 7 (38.9)  | Reference               | Reference              | 93 (51.1)    | 12 (66.7)  | Reference           | Reference               |
| Moderate to severe (EPDS≥ 9)                                                  | 70 (35.4)    | 11 (61.1) | <b>2.87 (1.08;8.12)</b> | 1.01 (0.87;1.18)       | 89 (48.9)    | 6 (33.3)   | 0.52 (0.18;1.41)    | <b>0.18 (0.03;0.73)</b> |

Table 2A (Continued)

|                                                                                | Boys       |           |                  |                     | Girls      |           |                  |                         |
|--------------------------------------------------------------------------------|------------|-----------|------------------|---------------------|------------|-----------|------------------|-------------------------|
|                                                                                | DS / RLAM  | FRAP      | Crude OR (95%CI) | Adjusted OR (95%CI) | DS / RLAM  | FRAP      | Crude OR (95%CI) | Adjusted OR (95%CI)     |
| <i>In utero exposure to maternal anxiety</i>                                   |            |           |                  |                     |            |           |                  |                         |
| None to mild (GAD-7 ≤ 9)                                                       | 178 (89.9) | 16 (88.9) | Reference        | Reference           | 166 (91.2) | 15 (83.3) | Reference        | Reference               |
| Moderate to severe (GAD-7 > 9)                                                 | 20 (10.1)  | 2 (11.1)  | 1.11 (0.17;4.31) | 1.24 (0.12;9.87)    | 16 (8.8)   | 3 (16.7)  | 2.08 (0.45;7.16) | 2.68 (0.37;19.5)        |
| <i>In utero exposure to stress related to the COVID-19 pandemic, mean (SD)</i> | 4.3 (2.2)  | 4.7 (2.2) | 1.45 (0.98;2.31) | 1.53 (0.86;3.18)    | 4.7 (2.0)  | 4.6 (2.0) | 1.18 (0.92;1.55) | <b>1.44 (1.04;2.06)</b> |
| <i>In utero exposure to maternal antidepressants</i>                           |            |           | 1.08 (0.86;1.35) | 1.18 (0.85;1.68)    |            |           |                  |                         |
| No                                                                             | 165 (83.3) | 14 (77.8) | Reference        | Reference           | 139 (76.4) | 14 (77.8) | Reference        | Reference               |
| Yes                                                                            | 33 (16.7)  | 4 (22.2)  | 1.43 (0.39;4.28) | 0.53 (0.03;5.93)    | 43 (23.6)  | 4 (22.2)  | 0.92 (0.25;2.73) | 4.02 (0.46;37.1)        |
| <b>Fine motor<sup>c</sup></b>                                                  |            |           |                  |                     |            |           |                  |                         |
| <i>In utero exposure to maternal depression</i>                                |            |           |                  |                     |            |           |                  |                         |
| None to mild (EPDS < 9)                                                        | 130 (62.2) | 5 (71.4)  | Reference        | Reference           | 103 (52.6) | 2 (50.0)  | Reference        | Reference               |
| Moderate to severe (EPDS ≥ 9)                                                  | 79 (37.8)  | 2 (28.6)  | 0.66 (0.09;3.13) | 0.63 (0.05;5.13)    | 93 (47.4)  | 2 (50.0)  | 1.11 (0.13;9.38) | 0.31 (0.01;7.86)        |
| <i>In utero exposure to maternal anxiety</i>                                   |            |           |                  |                     |            |           |                  |                         |
| None to mild (GAD-7 ≤ 9)                                                       | 188 (90)   | 6 (85.7)  | Reference        | Reference           | 179 (91.3) | 2 (50.0)  | Reference        | Reference               |
| Moderate to severe (GAD-7 > 9)                                                 | 21 (10)    | 1 (14.3)  | 1.49 (0.08;9.33) | 3.02 (0.05;98.2)    | 17 (8.7)   | 2 (50.0)  | 10.5 (1.20;92.4) | NA                      |

Table 2A (Continued)

|                                                                                | Boys       |           |                  |                     | Girls      |           |                  |                        |
|--------------------------------------------------------------------------------|------------|-----------|------------------|---------------------|------------|-----------|------------------|------------------------|
|                                                                                | DS / RLAM  | FRAP      | Crude OR (95%CI) | Adjusted OR (95%CI) | DS / RLAM  | FRAP      | Crude OR (95%CI) | Adjusted OR (95%CI)    |
| <i>In utero</i> exposure to stress related to the COVID-19 pandemic, mean (SD) | 4.3 (2.2)  | 4.7 (2)   | 1.08 (0.76;1.54) | 1.25 (0.77;2.14)    | 4.7 (2.0)  | 5.0 (3.4) | 1.08 (0.66;1.88) | 0.85 (0.39;1.73)       |
| <i>In utero</i> exposure to maternal antidepressants                           |            |           |                  |                     |            |           |                  |                        |
| No                                                                             | 173 (82.8) | 6 (85.7)  | Reference        | Reference           | 150 (76.5) | 3 (75.0)  | Reference        | Reference              |
| Yes                                                                            | 36 (17.2)  | 1 (14.3)  | 0.80 (0.04;4.89) | 0.37 (0.01;6.06)    | 46 (23.5)  | 1 (25.0)  | 1.09 (0.05;8.72) | 0.45 (0.00;36.3)       |
| Problem solving <sup>d</sup>                                                   |            |           |                  |                     |            |           |                  |                        |
| <i>In utero</i> exposure to maternal depression                                |            |           |                  |                     |            |           |                  |                        |
| None to mild (EPDS<9)                                                          | 118 (62.1) | 16 (72.7) | Reference        | Reference           | 99 (53.2)  | 4 (50.0)  | Reference        | Reference              |
| Moderate to severe (EPDS≥ 9)                                                   | 72 (37.9)  | 6 (27.3)  | 0.61 (0.21;1.57) | 0.70 (0.19;2.32)    | 87 (46.8)  | 4 (50.0)  | 1.14 (0.26;4.94) | 0.26 (0.02;2.16)       |
| <i>In utero</i> exposure to maternal anxiety                                   |            |           |                  |                     |            |           |                  |                        |
| None to mild (GAD-7 ≤ 9)                                                       | 169 (88.9) | 21 (95.5) | Reference        | Reference           | 171 (91.9) | 6 (75.0)  | Reference        | Reference              |
| Moderate to severe (GAD-7>9)                                                   | 21 (11.1)  | 1 (4.6)   | 0.38 (0.02;1.99) | 0.44 (0.02;3.32)    | 15 (8.1)   | 2 (25.0)  | 3.80 (0.53;18.2) | <b>21.8 (1.05;846)</b> |
| <i>In utero</i> exposure to stress related to the COVID-19 pandemic, mean (SD) | 4.4 (2.2)  | 4 (2.2)   | 0.91 (0.74;1.12) | 0.91 (0.69;1.19)    | 4.6 (1.9)  | 5.9 (2.1) | 1.45 (0.98;2.31) | 1.53 (0.86;3.18)       |
| <i>In utero</i> exposure to maternal antidepressants                           |            |           |                  |                     |            |           |                  |                        |
| No                                                                             | 157 (82.6) | 18 (81.8) | Reference        | Reference           | 142 (76.3) | 7 (87.5)  | Reference        | Reference              |
| Yes                                                                            | 33 (17.4)  | 4 (18.2)  | 1.06 (0.29;3.06) | 2.03 (0.37;9.16)    | 44 (23.7)  | 1 (12.5)  | 0.46 (0.02;2.69) | 0.09 (0.00;5.39)       |

Table 2A (Continued)

|                                                                                       | Boys        |            |                     |                        | Girls      |           |                     |                        |
|---------------------------------------------------------------------------------------|-------------|------------|---------------------|------------------------|------------|-----------|---------------------|------------------------|
|                                                                                       | DS / RLAM   | FRAP       | Crude OR<br>(95%CI) | Adjusted OR<br>(95%CI) | DS / RLAM  | FRAP      | Crude OR<br>(95%CI) | Adjusted OR<br>(95%CI) |
| <b>Personal and social<sup>e</sup></b>                                                |             |            |                     |                        |            |           |                     |                        |
| <b><i>In utero</i> exposure to maternal depression</b>                                |             |            |                     |                        |            |           |                     |                        |
| None to mild (EPDS<9)                                                                 | 128 (61.54) | 7 (100.00) | NA                  | NA                     | 100 (52.9) | 3 (50.0)  | Reference           | Reference              |
| Moderate to severe (EPDS≥ 9)                                                          | 80 (38.46)  | 0 (0.00)   | NA                  | NA                     | 89 (47.1)  | 3 (50.0)  | 1.12 (0.20;6.20)    | 0.57 (0.05;5.03)       |
| <b><i>In utero</i> exposure to maternal anxiety</b>                                   |             |            |                     |                        |            |           |                     |                        |
| None to mild (GAD-7 ≤ 9)                                                              | 187 (89.9)  | 6 (85.7)   | Reference           | Reference              | 172 (91.0) | 5 (83.3)  | Reference           | Reference              |
| Moderate to severe (GAD-7>9)                                                          | 21 (10.1)   | 1 (14.3)   | 1.48 (0.08;9.28)    | 2.40 (0.08;34.4)       | 17 (9.0)   | 1 (16.7)  | 2.02 (0.10;13.5)    | 2.39 (0.09;36.7)       |
| <b><i>In utero</i> exposure to stress related to the COVID-19 pandemic, mean (SD)</b> | 4.4 (2.2)   | 4.1 (2.3)  | 0.96 (0.67;1.35)    | 1.15 (0.67;2.04)       | 4.7 (2.0)  | 5.3 (1.0) | 1.20 (0.79;1.95)    | 1.32 (0.73;2.62)       |

Na;none applicable

SD;standard deviation; DS;Development on schedule; RLAM;Required learning activities and monitoring; FRAP;further assessment required by professional

Communication scores categorized: DS/ RLAM;the child appears to be on schedule (14-60); FRAP (0 – 14); Gross motor scores categorized: DS/ RLAM;the child appears to be on schedule (36-60); FRAP;the child may be needs further assessment by a professional (0-35); Fine motor scores categorized: DS/ RLAM;the child appears to be on schedule (35-60); FRAP;the child may be needs further assessment by a professional (0-34); Problem solving scores categorized: DS/ RLAM;the child appears to be on schedule (26-60); FRAP;the child may be needs further assessment by a professional (0-25); Personal and social scores categorized: DS/ RLAM;the child appears to be on schedule (27-60); FRAP;the child may be needs further assessment by a professional (0-26)

Using the Edinburgh postnatal depression scale cut-off as follows: scale 0 to 8 means no in utero exposure to maternal depression;scale 9 and more means in utero exposure to moderate to severe maternal depression

Using the generalized anxiety disorder 7-items scale cut-off as follows: scale 0 to 9 means no maternal anxiety;scale 10 and more means in utero exposure to moderate to severe maternal anxiety

Using the overall maternal stress related to COVID-19 measured on a scale from 0 (no stress) to 10 (extreme stress)

Antidepressants use defined by diagnosis of depression or anxiety combined to the use of antidepressants before delivery

\*Adjusted models

For boys:

Communication: maternal depression;maternal age;area of residence;pre-pregnancy body mass index;maternal asthma;maternal diabetes (including gestational diabetes);maternal hypertension (including preeclampsia);education years;maternal anxiety;maternal stress related to COVID,19 pandemic;antidepressants use;historic of depression;medication use;ethnicity;period of recruitment;gestational age at recruitment;CASC150 score

Gross motor : maternal depression;maternal age;area of residence;annual household income;marital status;pre-pregnancy body mass index;maternal diabetes (including gestational diabetes);education years;maternal anxiety;maternal stress related to COVID,19 pandemic;antidepressants use;historic of depression;historic of anxiety;period of recruitment;gestational age at recruitment;CASC150 scores;medication use;ethnicity

Fine motor : maternal depression;maternal age;area of residence;annual household income;pre-pregnancy body mass index;maternal asthma;maternal diabetes (including gestational diabetes);education years;maternal anxiety;maternal stress related to COVID,19 pandemic;antidepressants use;ethnicity;gestational age at recruitment;CASC150 scores;medication use

Problem solving : maternal depression;maternal age;area of residence;annual household income;pre-pregnancy body mass index;maternal asthma;maternal diabetes (including gestational diabetes);maternal hypertension (including preeclampsia);education years;maternal anxiety;ethnicity;medication use;maternal stress related to COVID,19 pandemic;antidepressants use;historic of depression;period of recruitment;gestational age at recruitment;CASC150 scores

Personal and social : maternal age;pre-pregnancy body mass index;maternal diabetes (including gestational diabetes);education years;maternal anxiety;maternal stress related to COVID,19 pandemic;period of recruitment;gestational age at recruitment;CASC150 scores;medication use

For girls:

Communication : maternal depression;maternal age;pre-pregnancy body mass index;maternal hypertension (including preeclampsia);education years;maternal stress related to COVID,19 pandemic;gestational age at recruitment;CASC150 score;the generalized anxiety disorder 7-items scale continuous score

Gross motor : maternal depression;maternal age;area of residence;pre-pregnancy body mass index;maternal diabetes (including gestational diabetes);maternal hypertension (including preeclampsia);education years;maternal anxiety;maternal stress related to COVID,19 pandemic;antidepressants use;historic of depression;historic of anxiety;period of recruitment;gestational age at recruitment ;CASC150 score;medication use;ethnicity

Fine motor : maternal depression;maternal age;annual household income;pre-pregnancy body mass index;maternal diabetes (including gestational diabetes);education years;maternal stress related to COVID,19 pandemic;antidepressants use;historic of depression;historic of anxiety;gestational age at recruitment;CASC150 score;medication use;the generalized anxiety disorder 7-items scale continuous score

Problem solving : for maternal depression;maternal age;area of residence;marital status;pre-pregnancy body mass index;maternal asthma;maternal diabetes (including gestational diabetes);education years;maternal anxiety;ethnicity;medication use;maternal stress related to COVID,19 pandemic;antidepressants use;historic of depression;historic of anxiety;gestational age at recruitment;CASC150 score

Personal and social : maternal depression;maternal age;annual household income;pre-pregnancy body mass index;maternal diabetes (including gestational diabetes);maternal hypertension (including preeclampsia);education years;maternal anxiety;maternal stress related to COVID,19 pandemic;gestational age at recruitment;CASC150 score;medication use

Bold numbers indicate significant association ( $p < 0.05$ )

Table 3A Association between in utero exposure to depression, anxiety, stress, antidepressants, and Ages and stages questionnaire – third edition (ASQ-3) – stratified for child status infection by COVID-19

|                                                                                | Infected by COVID-19 |           |                  |                     | Not infected by COVID-19 |           |                         |                           |
|--------------------------------------------------------------------------------|----------------------|-----------|------------------|---------------------|--------------------------|-----------|-------------------------|---------------------------|
|                                                                                | DS / RLAM            | FRAP      | Crude OR (95%CI) | Adjusted OR (95%CI) | DS / RLAM                | FRAP      | Crude OR (95%CI)        | Adjusted OR (95%CI)       |
| <b>Communication<sup>a</sup></b>                                               |                      |           |                  |                     |                          |           |                         |                           |
| <i>In utero exposure to maternal depression</i>                                |                      |           |                  |                     |                          |           |                         |                           |
| None to mild (EPDS<9)                                                          | 157 (60.4)           | 1 (25.0)  | Reference        | Reference           | 111 (55.8)               | 4 (66.7)  | Reference               | Reference                 |
| Moderate to severe (EPDS≥ 9)                                                   | 103 (39.6)           | 3 (75.0)  | 4.57 (0.58;93.1) | 12.7 (0.59;681)     | 88 (44.2)                | 2 (33.3)  | 0.63 (0.09;3.31)        | <b>0.05 (0.00;0.85)</b>   |
| <i>In utero exposure to maternal anxiety</i>                                   |                      |           |                  |                     |                          |           |                         |                           |
| None to mild (GAD-7 ≤ 9)                                                       | 240 (92.3)           | 3 (75.0)  | Reference        | Reference           | 177 (88.9)               | 3 (50)    | Reference               | Reference                 |
| Moderate to severe (GAD-7>9)                                                   | 20 (7.7)             | 1 (25.0)  | 4.00 (0.19;32.9) | 2.64 (0.06;82.1)    | 22 (11.1)                | 3 (50)    | <b>8.05 (1.42;45.9)</b> | <b>86.0 (3.25;11,212)</b> |
| <i>In utero exposure to stress related to the COVID-19 pandemic, mean (SD)</i> | 4.5 (2.0)            | 4.8 (2.8) | 1.06 (0.65;1.79) | 0.69 (0.28;1.46)    | 4.4 (2.2)                | 4.8 (2.4) | 1.09 (0.75;1.60)        | 1.42 (0.77;2.91)          |
| <i>In utero exposure to maternal antidepressants</i>                           |                      |           |                  |                     |                          |           |                         |                           |
| No                                                                             | 205 (78.8)           | 3 (75.0)  | Reference        | Reference           | 159 (79.9)               | 5 (83.3)  | Reference               | Reference                 |
| Yes                                                                            | 55 (21.2)            | 1 (25.0)  | 1.24 (0.06;9.92) | 0.14 (0.00;72.0)    | 40 (20.1)                | 1 (16.7)  | 0.80 (0.04;5.11)        | 0.52 (0.00;48.5)          |
| <b>Gross motor<sup>b</sup></b>                                                 |                      |           |                  |                     |                          |           |                         |                           |
| <i>In utero exposure to maternal depression</i>                                |                      |           |                  |                     |                          |           |                         |                           |
| None to mild (EPDS<9)                                                          | 148 (60.7)           | 8 (44.4)  | Reference        | Reference           | 101 (55.2)               | 14 (60.9) | Reference               | Reference                 |
| Moderate to severe (EPDS≥ 9)                                                   | 96 (39.3)            | 10 (55.6) | 1.93 (0.73;5.21) | 1.57 (0.45;5.51)    | 82 (44.8)                | 9 (39.1)  | 0.79 (0.32;1.90)        | 0.78 (0.21;2.73)          |
| <i>In utero exposure to maternal anxiety</i>                                   |                      |           |                  |                     |                          |           |                         |                           |
| None to mild (GAD-7 ≤ 9)                                                       | 225 (92.2)           | 16 (88.9) | Reference        | Reference           | 160 (87.4)               | 20 (87.0) | Reference               | Reference                 |
| Moderate to severe (GAD-7>9)                                                   | 19 (7.8)             | 2 (11.1)  | 1.48 (0.22;5.75) | 1.27 (0.15;7.39)    | 23 (12.6)                | 3 (13.0)  | 1.04 (0.23;3.36)        | 0.78 (0.12;4.23)          |

Table 3A (Continued)

|                                                                                       | Infected by COVID-19 |           |                         |                         | Not infected by COVID-19 |           |                  |                         |
|---------------------------------------------------------------------------------------|----------------------|-----------|-------------------------|-------------------------|--------------------------|-----------|------------------|-------------------------|
|                                                                                       | DS / RLAM            | FRAP      | Crude OR (95%CI)        | Adjusted OR (95%CI)     | DS / RLAM                | FRAP      | Crude OR (95%CI) | Adjusted OR (95%CI)     |
| <b>In utero exposure to stress related to the COVID-19 pandemic, mean (SD)</b>        | 4.5 (2.0)            | 5.2 (1.9) | 1.19 (0.94;1.54)        | 1.25 (0.91;1.74)        | 4.4 (2.2)                | 4.6 (2.2) | 1.04 (0.85;1.27) | 1.15 (0.87;1.53)        |
| <b><i>In utero exposure to maternal antidepressants</i></b>                           |                      |           |                         |                         |                          |           |                  |                         |
| No                                                                                    | 194 (79.5)           | 14 (77.8) | Reference               | Reference               | 146 (79.8)               | 18 (78.3) | Reference        | Reference               |
| Yes                                                                                   | 50 (20.5)            | 4 (22.2)  | 1.11 (0.30;3.25)        | 0.32 (0.02;3.84)        | 37 (20.2)                | 5 (21.7)  | 1.10 (0.34;2.96) | 1.90 (0.33;10.9)        |
| <b>Fine motor<sup>c</sup></b>                                                         |                      |           |                         |                         |                          |           |                  |                         |
| <b><i>In utero exposure to maternal depression</i></b>                                |                      |           |                         |                         |                          |           |                  |                         |
| None to mild (EPDS<9)                                                                 | 154 (59.5)           | 2 (66.7)  | Reference               | Reference               | 109 (55.1)               | 6 (75.0)  | Reference        | Reference               |
| Moderate to severe (EPDS≥ 9)                                                          | 105 (40.5)           | 1 (33.3)  | 0.73 (0.03;7.75)        | 7.80 (0.20;443)         | 89 (44.9)                | 2 (25.0)  | 0.41 (0.06;1.82) | <b>0.02 (0.00;0.38)</b> |
| <b>Stress in utero related to COVID-19 pandemic, mean (SD)</b>                        | 4.6 (2.0)            | 2 (1.0)   | <b>0.47 (0.19;0.91)</b> | <b>0.38 (0.10;0.92)</b> | 4.4 (2.2)                | 5.4 (1.7) | 1.23 (0.89;1.74) | <b>1.73 (1.01;3.35)</b> |
| <b>Maternal antidepressants use</b>                                                   |                      |           |                         |                         |                          |           |                  |                         |
| No                                                                                    | 205 (79.2)           | 3 (100.0) | NA                      | NA                      | 158 (79.8)               | 6 (75.0)  | Reference        | Reference               |
| Yes                                                                                   | 54 (20.8)            | 0 (0.0)   | NA                      | NA                      | 40 (20.2)                | 2 (25.0)  | 1.32 (0.19;5.96) | 0.84 (0.02;19.8)        |
| <b>Problem solving</b>                                                                |                      |           |                         |                         |                          |           |                  |                         |
| <b><i>In utero exposure to maternal depression</i></b>                                |                      |           |                         |                         |                          |           |                  |                         |
| None to mild (EPDS<9)                                                                 | 118 (62.1)           | 16 (72.7) | Reference               | Reference               | 105 (56.5)               | 8 (61.5)  | Reference        | Reference               |
| Moderate to severe (EPDS≥ 9)                                                          | 72 (37.9)            | 6 (27.3)  | 0.61 (0.21;1.57)        | 0.70 (0.19;2.32)        | 81 (43.5)                | 5 (38.5)  | 0.81 (0.24;2.52) | 0.36 (0.05;1.91)        |
| <b><i>In utero exposure to maternal anxiety</i></b>                                   |                      |           |                         |                         |                          |           |                  |                         |
| None to mild (GAD-7 ≤ 9)                                                              | 169 (88.9)           | 21 (95.5) | Reference               | Reference               | 165 (88.7)               | 10 (76.9) | Reference        | Reference               |
| Moderate to severe (GAD-7>9)                                                          | 21 (11.1)            | 1 (4.6)   | 0.38 (0.02;1.99)        | 0.44 (0.02;3.32)        | 21 (11.3)                | 3 (23.1)  | 2.36 (0.50;8.45) | 6.17 (0.65;66.9)        |
| <b><i>In utero exposure to stress related to the COVID-19 pandemic, mean (SD)</i></b> | 4.4 (2.2)            | 4 (2.2)   |                         |                         | 4.4 (2.2)                | 4.6 (2.4) | 1.05 (0.81;1.36) | 1.02 (0.69;1.51)        |

Table 3A (Continued)

|                                                                                       | Boys       |           |                     |                        | Girls      |           |                     |                        |
|---------------------------------------------------------------------------------------|------------|-----------|---------------------|------------------------|------------|-----------|---------------------|------------------------|
|                                                                                       | DS / RLAM  | FRAP      | Crude OR<br>(95%CI) | Adjusted OR<br>(95%CI) | DS / RLAM  | FRAP      | Crude OR<br>(95%CI) | Adjusted OR<br>(95%CI) |
| No                                                                                    | 157 (82.6) | 18 (81.8) | Reference           | Reference              | 148 (79.6) | 10 (76.9) | Reference           | Reference              |
| Yes                                                                                   | 33 (17.4)  | (18.2)    | 1.06 (0.29;3.06)    | 2.03 (0.37;9.16)       | 38 (20.4)  | 3 (23.1)  | 1.17 (0.25;4.04)    | 0.43 (0.03;3.94)       |
| <b>Personal and social<sup>e</sup></b>                                                |            |           |                     |                        |            |           |                     |                        |
| <b><i>In utero</i> exposure to maternal depression</b>                                |            |           |                     |                        |            |           |                     |                        |
| None to mild (EPDS<9)                                                                 | 148 (59.0) | 6 (85.7)  | Reference           | Reference              | 110 (56.1) | 4 (66.7)  | Reference           | Reference              |
| Moderate to severe (EPDS≥ 9)                                                          | 103 (41.0) | 1 (14.3)  | 0.24 (0.01;1.43)    | 0.08 (0.00;1.16)       | 86 (43.9)  | 2 (33.3)  | 0.64 (0.09;3.36)    | 0.27 (0.01;2.53)       |
| <b><i>In utero</i> exposure to maternal anxiety</b>                                   |            |           |                     |                        |            |           |                     |                        |
| None to mild (GAD-7 ≤ 9)                                                              | 231 (92.0) | 6 (85.7)  | Reference           | Reference              | 172 (87.8) | 5 (83.3)  | Reference           | Reference              |
| Moderate to severe (GAD-7>9)                                                          | 20 (8.0)   | 1 (14.3)  | 1.92 (0.10;12.1)    | 1.53 (0.03;87.5)       | 24 (12.2)  | 1 (16.7)  | 1.43 (0.07;9.40)    | 3.93 (0.11;103)        |
| <b><i>In utero</i> exposure to stress related to the COVID-19 pandemic, mean (SD)</b> | 4.5 (2.0)  | 4.6 (2.1) | 1.01 (0.69;1.49)    | 1.23 (0.70;2.21)       | 4.4 (2.2)  | 4.8 (1.7) | 1.09 (0.75;1.61)    | 1.40 (0.81;2.59)       |

Na;none applicable

SD;standard deviation; DS;Development on schedule; RLAM;Required learning activities and monitoring; FAR;further assessment required by professional

Communication scores categorized: DS/ RLAM;the child appears to be on schedule (14-60); FARP (0 – 14); Gross motor scores categorized: DS/ RLAM;the child appears to be on schedule (36-60); FARP;the child may be needs further assessment by a professional (0-35); Fine motor scores categorized: DS/ RLAM;the child appears to be on schedule (35-60); FARP;the child may be needs further assessment by a professional (0-34); Problem solving scores categorized: DS/ RLAM;the child appears to be on schedule (26-60); FARP;the child may be needs further assessment by a professional (0-25); Personal and social scores categorized: DS/ RLAM;the child appears to be on schedule (27-60); FARP;;the child may be needs further assessment by a professional (0-26)

Using the Edinburgh postnatal depression scale cut-off as follows: scale 0 to 8 means no in utero exposure to maternal depression;scale 9 and more means in utero exposure to moderate to severe maternal depression

Using the generalized anxiety disorder 7-items scale cut-off as follows: scale 0 to 9 means no maternal anxiety;scale 10 and more means in utero exposure to moderate to severe maternal anxiety

Using the overall maternal stress related to COVID-19 measured on a scale from 0 (no stress) to 10 (extreme stress)

Antidepressants use defined by diagnosis of depression or anxiety combined to the use of antidepressants before delivery

Adjusted models

For children infected by COVID-19

Communication : maternal depression;maternal age;pre-pregnancy body mass index;maternal asthma;education year;maternal anxiety;maternal stress;antidepressants use;historic of depression;ethnicity;historic of anxiety;period of recruitment;gestational age at recruitment;CONCEPTION study Assessment of Stress from COVID-19 – 150 points score (CASC150 score)

Gross motor : maternal depression;maternal age;area of residence;annual household income;marital status;pre-pregnancy body mass index ;education year;maternal anxiety;maternal stress Antidepressants use;historic of depression;historic of anxiety;period of recruitment;gestational age at recruitment;CONCEPTION study Assessment of Stress from COVID-19 – 150 points score;medication use

Fine motor : maternal depression;maternal age;pre-pregnancy body mass index;education year;maternal stress;gestational age at recruitment;CASC150 score;medication use

Problem solving : maternal depression;maternal age;area of residence;annual household income;pre-pregnancy body mass index;maternal asthma;maternal diabetes (including gestational diabetes);education year;maternal anxiety;ethnicity;medication use;maternal stress;antidepressants use;historic of depression;historic of anxiety;period of recruitment;gestational age at recruitment;CASC150 score

Personal and social : maternal depression;maternal age;annual household income;pre-pregnancy body mass index;maternal diabetes (including gestational diabetes);maternal hypertension (including preeclampsia);education year;maternal anxiety;maternal stress;period of recruitment;gestational age at recruitment;CASC150 score;medication use

For children not infected by COVID-19

Communication : maternal anxiety;maternal age;pre-pregnancy body mass index;maternal asthma;maternal diabetes (including gestational diabetes);maternal hypertension (including preeclampsia);education year;the Edinburgh postnatal depression scale continuously;maternal stress;antidepressants use;medication use;ethnicity;historic of anxiety;gestational age at recruitment;CASC150 score

Gros motor : maternal depression;maternal age;area of residence;annual household income;marital status;pre-pregnancy body mass index;maternal diabetes (including gestational diabetes);maternal hypertension (including preeclampsia);education year;maternal anxiety;maternal stress;antidepressants use;historic of depression;historic of anxiety;period of recruitment;gestational age at recruitment;CASC150 score;medication use;ethnicity

Fine motor : maternal anxiety;maternal age;area of residence;annual household income;pre-pregnancy body mass index;maternal asthma;maternal diabetes (including gestational diabetes);education year;EPDStotalI;maternal stress; antidepressants use;historic of depression;historic of anxiety;period of recruitment;ethnicity;gestational age at recruitment;CASC150 score;medication use

Problem solving : maternal depression;maternal age;area of residence;annual household income;marital status;pre-pregnancy body mass index;maternal diabetes (including gestational diabetes);maternal hypertension (including preeclampsia);education year;maternal anxiety;ethnicity;medication use;maternal stress;antidepressants use;historic of depression;historic of anxiety;gestational age at recruitment;CASC150 score

Personal and social : maternal depression;maternal age;annual household income;pre-pregnancy body mass index;maternal diabetes (including gestational diabetes);education year;maternal anxiety;maternal stress;gestational age at recruitment;CASC150 score;medication use
